# Supplementary material for: Regimen simplification and medication adherence: Fixed-dose versus loose-dose combination therapy for type 2 diabetes
Source: PubMed Central journal article supplement (PMC8096115; doi:10.1371/journal.pone.0250993), 2021-05-04
Supplement: pone.0250993.s002.pdf [file pone.0250993.s002.pdf]

**S1 Table. ICD-10 coding for adverse drug events.** Most frequent primary and secondary diagnosis (ICD-10) associated with adverse drug events in German hospitals.

| <b>Code</b> | <b>Diagnosis</b>                                                                  |
|-------------|-----------------------------------------------------------------------------------|
| A04.7       | Enterocolitis due to Clostridium difficile                                        |
| T88.7       | Unspecified adverse effect of drug or medicament                                  |
| I95.2       | Hypotension due to drugs                                                          |
| D69.0       | Allergic purpura                                                                  |
| T50.9       | Poisoning by other and unspecified drugs, medicaments, and biological substances  |
| T78.3       | Adverse effect, not elsewhere classified: Angioneurotic oedema                    |
| L27.0       | Generalized skin eruption due to drugs and medicaments                            |
| K52.1       | Toxic gastroenteritis and colitis                                                 |
| D70.10      | Agranulocytosis due to drugs and medicaments                                      |
| T78.4       | Adverse effect, not elsewhere classified: Allergy, unspecified                    |
| Y57.9       | Complications due to drug or medicament, unspecified                              |
| T80.1       | Vascular complications following infusion, transfusion, and therapeutic injection |
| D61.10      | Drug-induced aplastic anaemia                                                     |
| D69.59      | Secondary thrombocytopenia                                                        |
| F13.7       | Residual and late-onset psychotic disorder                                        |

Based on Stausberg J, Hasford J. Identification of adverse drug events: the use of ICD-10 coded diagnoses in routine hospital data. *Dtsch Arztebl Int.* 2010; 107:23–9. doi: 10.3238/arztebl.2010.0023 PMID: 20140170. Tables 3, 4.
