# Supplementary material for: Regimen simplification and medication adherence: Fixed-dose versus loose-dose combination therapy for type 2 diabetes
Source: PubMed Central journal article supplement (PMC8096115; doi:10.1371/journal.pone.0250993), 2021-05-04
Supplement: pone.0250993.s003.pdf [file pone.0250993.s003.pdf]

**S2 Table. ICD-10 codes of disease-related morbidities.** ICD-10 coding for microangiopathic and macroangiopathic complications.

| <b>Diagnoses</b>                                 | <b>Codes (ICD-10)</b>                                                                                                                                   |
|--------------------------------------------------|---------------------------------------------------------------------------------------------------------------------------------------------------------|
| <b>Microangiopathic complications</b>            |                                                                                                                                                         |
| Eye complications                                | H280, H54, H431, H358, H350, H352, H360, E113                                                                                                           |
| Renal failure                                    | E112, Z49, Z992, Z940, T861, E112, N17, N18, N19, N049, N059, N083, N26, N289, T824, T861                                                               |
| Diabetic foot syndrome and peripheral neuropathy | E114, E115, Z894, Z895, Z896, Z897, Z898, Z899, R02, L97, L984, G590, G632, G990, G730, G62, G629, G63, M142, M146, I792, I739, I702, I74, E1174, E1175 |
| <b>Macroangiopathic complications</b>            |                                                                                                                                                         |
| Angina pectoris                                  | I20                                                                                                                                                     |
| Myocardial infarction                            | I21-I23                                                                                                                                                 |
| Ischemic heart disease                           | I24, I25                                                                                                                                                |
| Heart failure                                    | I50                                                                                                                                                     |
| Cerebrovascular disease                          | I60-I66, I69                                                                                                                                            |

Based on von Ferber, Liselotte, Ingrid Köster, and Hans Hauner. "Kosten der antihyperglykämischen Behandlung des Diabetes mellitus." *Medizinische Klinik* 101.5 (2006): 384-393.
