# Supplementary material for: Regimen simplification and medication adherence: Fixed-dose versus loose-dose combination therapy for type 2 diabetes
Source: PubMed Central journal article supplement (PMC8096115; doi:10.1371/journal.pone.0250993), 2021-05-04
Supplement: pone.0250993.s004.pdf [file pone.0250993.s004.pdf]

**S3 Table. Differences between study cohorts.** Detailed information about the percentage of individuals with comorbidities (Elixhauser groups, pharmacy-based metrics and type 2 diabetes-specific comorbidities) in the fixed-dose combination and loose-dose combination cohorts before and after entropy balancing.

**S4 Table. Differences between study cohorts.** Detailed information about differences in comorbidities between cohorts.

|                                      |                                         | FDC (in %)                                 | LDC (in %) |       | SMD    |       |
|--------------------------------------|-----------------------------------------|--------------------------------------------|------------|-------|--------|-------|
|                                      |                                         |                                            | Before     | After | Before | After |
| <b>Elixhauser comorbidity groups</b> |                                         |                                            |            |       |        |       |
| 1                                    | Congestive heart failure                | 6.74                                       | 11.97      | 6.76  | -0.21  | 0.00  |
| 2                                    | Cardiac arrhythmias                     | 13.23                                      | 14.96      | 13.24 | -0.05  | 0.00  |
| 3                                    | Valvular disease                        | 5.42                                       | 5.13       | 5.42  | 0.01   | 0.00  |
| 4                                    | Pulmonary circulation disorders         | 1.19                                       | 2.56       | 1.25  | -0.13  | -0.01 |
| 5                                    | Peripheral vascular disorders           | 11.51                                      | 11.54      | 11.50 | 0.02   | 0.00  |
| 6                                    | Hypertension uncomplicated              | 76.59                                      | 79.91      | 76.63 | -0.08  | 0.00  |
| 7                                    | Hypertension complicated                | 8.33                                       | 11.97      | 8.35  | -0.13  | 0.00  |
| 8                                    | Paralysis                               | 2.78                                       | 2.56       | 2.78  | 0.01   | 0.00  |
| 9                                    | Other neurological disorders            | 3.44                                       | 2.99       | 3.44  | 0.02   | 0.00  |
| 10                                   | Chronic pulmonary disease               | 13.89                                      | 16.24      | 13.89 | -0.07  | 0.00  |
| 11                                   | Diabetes uncomplicated                  | Population of interest, inclusion criteria |            |       |        |       |
| 12                                   | Diabetes complicated                    | Population of interest, inclusion criteria |            |       |        |       |
| 13                                   | Hypothyroidism                          | 11.77                                      | 13.25      | 11.77 | -0.05  | 0.00  |
| 14                                   | Renal failure                           | 6.48                                       | 6.41       | 6.49  | 0.00   | 0.00  |
| 15                                   | Liver disease                           | 20.50                                      | 24.36      | 20.51 | -0.10  | 0.00  |
| 16                                   | Peptic ulcer disease excluding bleeding | 0.93                                       | 2.14       | 0.93  | -0.13  | 0.00  |
| 17                                   | AIDS/HIV                                | Dropped due to missing variation           |            |       |        |       |
| 18                                   | Lymphoma                                | 0.53                                       | 0.43       | 0.53  | 0.01   | 0.00  |
| 19                                   | Metastatic cancer                       | 0.66                                       | 0.43       | 0.66  | 0.03   | 0.00  |
| 20                                   | Solid tumor without metastasis          | 9.13                                       | 9.83       | 9.12  | -0.02  | 0.00  |
| 21                                   | Rheumatoid arthritis                    | 5.56                                       | 4.70       | 5.59  | 0.04   | 0.00  |
| 22                                   | Coagulopathy                            | 1.59                                       | 3.85       | 1.59  | -0.18  | 0.00  |
| 23                                   | Obesity                                 | 36.11                                      | 34.19      | 36.11 | 0.04   | 0.00  |
| 24                                   | Weight loss                             | 0.40                                       | 0.85       | 0.40  | -0.07  | 0.00  |
| 25                                   | Fluid and electrolyte disorders         | 3.57                                       | 4.70       | 3.58  | -0.06  | 0.00  |
| 26                                   | Blood loss anemia                       | 0.13                                       | 0.43       | 0.13  | -0.08  | 0.00  |
| 27                                   | Deficiency anemias                      | 1.59                                       | 3.85       | 1.59  | -0.18  | 0.00  |
| 28                                   | Alcohol abuse                           | 2.65                                       | 4.27       | 2.64  | -0.10  | 0.00  |
| 29                                   | Drug abuse                              | 0.13                                       | 0.85       | 0.13  | -0.20  | 0.00  |
| 30                                   | Psychoses                               | 0.79                                       | 2.14       | 0.79  | -0.15  | 0.00  |
| 31                                   | Depression                              | 14.15                                      | 15.81      | 14.14 | -0.05  | 0.00  |

**S4 Table. Differences between study cohorts.** Detailed information about differences in comorbidities between cohorts.

|                                |                                       | FDC (in %)                                 | LDC (in %) |       | SMD    |       |
|--------------------------------|---------------------------------------|--------------------------------------------|------------|-------|--------|-------|
|                                |                                       |                                            | Before     | After | Before | After |
| <b>Pharmacy-based groups</b>   |                                       |                                            |            |       |        |       |
| 1                              | Antiplatelet                          | 5.03                                       | 2.14       | 5.02  | 0.13   | 0.00  |
| 2                              | Anticoagulant                         | 7.80                                       | 10.26      | 7.81  | -0.09  | 0.00  |
| 3                              | Epilepsy                              | 4.23                                       | 3.85       | 4.23  | 0.02   | 0.00  |
| 4                              | Hypertension                          | 12.04                                      | 13.68      | 12.03 | -0.05  | 0.00  |
| 5                              | HIV                                   | Dropped due to missing variation           |            |       |        |       |
| 6                              | Tuberculosis                          | Dropped due to missing variation           |            |       |        |       |
| 7                              | Rheumatic conditions                  | 8.47                                       | 8.12       | 8.52  | 0.01   | 0.00  |
| 8                              | Hyperlipidemia                        | 43.12                                      | 47.01      | 43.19 | -0.08  | 0.00  |
| 9                              | Malignancies                          | Dropped due to missing variation           |            |       |        |       |
| 10                             | Parkinson's disease                   | 1.85                                       | 1.28       | 1.85  | 0.04   | 0.00  |
| 11                             | Renal disease                         | Dropped due to missing variation           |            |       |        |       |
| 12                             | End stage renal disease (ESRD)        | Dropped due to missing variation           |            |       |        |       |
| 13                             | Anti-arrhythmic                       | 2.12                                       | 3.42       | 2.12  | -0.09  | 0.00  |
| 14                             | Ischaemic heart disease/Angina        | 3.97                                       | 3.85       | 3.97  | 0.01   | 0.00  |
| 15                             | Congestive heart failure/Hypertension | 69.71                                      | 72.22      | 69.80 | -0.05  | 0.00  |
| 16                             | Diabetes                              | Population of interest, inclusion criteria |            |       |        |       |
| 17                             | Glaucoma                              | 3.84                                       | 5.13       | 3.83  | -0.07  | 0.00  |
| 18                             | Liver failure                         | Dropped due to missing variation           |            |       |        |       |
| 19                             | Acid peptic disease                   | 31.08                                      | 32.91      | 31.14 | -0.04  | 0.00  |
| 20                             | Transplantation                       | 0.26                                       | 1.28       | 0.27  | -0.20  | 0.00  |
| 21                             | Respiratory illness, asthma           | 12.30                                      | 8.55       | 12.31 | 0.11   | 0.00  |
| 22                             | Thyroid disorders                     | 17.59                                      | 15.38      | 17.58 | 0.06   | 0.00  |
| 23                             | Gout                                  | 12.83                                      | 11.97      | 12.82 | 0.03   | 0.00  |
| 24                             | Inflammatory bowel disease, chronic   | 0.53                                       | 0.43       | 0.53  | 0.01   | 0.00  |
| 25                             | Pain and inflammation                 | 36.24                                      | 32.91      | 36.24 | 0.07   | 0.00  |
| 26                             | Pain                                  | 5.56                                       | 4.27       | 5.55  | 0.06   | 0.00  |
| 27                             | Depression                            | 9.92                                       | 14.53      | 9.92  | -0.15  | 0.00  |
| 28                             | Psychotic illness                     | 2.12                                       | 3.42       | 2.12  | -0.09  | 0.00  |
| 29                             | Bipolar disorders                     | Dropped due to missing variation           |            |       |        |       |
| 30                             | Anxiety and tension                   | 2.51                                       | 2.99       | 2.51  | -0.03  | 0.00  |
| 31                             | Hepatitis                             | Dropped due to missing variation           |            |       |        |       |
| 32                             | Ischemic heart disease/Hypertension   | 55.42                                      | 58.97      | 55.47 | -0.07  | 0.00  |
| <b>Disease-specific groups</b> |                                       |                                            |            |       |        |       |
| 1                              | Myocardial infarction                 | 4.10                                       | 6.41       | 4.10  | -0.12  | 0.00  |
| 2                              | Ischemic heart disease                | 18.39                                      | 19.66      | 18.44 | -0.03  | 0.00  |
| 3                              | Cerebrovascular diseases              | 8.07                                       | 9.40       | 8.08  | -0.05  | 0.00  |

**S4 Table. Differences between study cohorts.** Detailed information about differences in comorbidities between cohorts.

|                                     | FDC (in %) | LDC (in %) |       | SMD    |       |
|-------------------------------------|------------|------------|-------|--------|-------|
|                                     |            | Before     | After | Before | After |
| 4 Eye complication                  | 16.40      | 15.38      | 16.41 | 0.03   | 0.00  |
| 5 Diabetic foot syndrome/Neuropathy | 19.44      | 18.38      | 19.48 | 0.03   | 0.00  |
| 6 Renal complication                | 12.30      | 12.82      | 12.36 | -0.02  | 0.00  |
| 7 Angina pectoris                   | 3.44       | 1.71       | 3.43  | 0.09   | 0.00  |

FDC: fixed-dose combination, LDC: loose-dose combination, SMD: standardized mean difference
