# Supplementary material for: Regimen simplification and medication adherence: Fixed-dose versus loose-dose combination therapy for type 2 diabetes
Source: PubMed Central journal article supplement (PMC8096115; doi:10.1371/journal.pone.0250993), 2021-05-04
Supplement: pone.0250993.s005.pdf [file pone.0250993.s005.pdf]

**S4 Table. Weighted mean outcomes and regression results.** Mean outcomes for fixed-dose combination and weighted mean outcomes for loose-dose combination cohort in baseline (one year) and follow-up period (three years) with the respective difference-in-difference estimator, its standard error, and the p-value.

| <b>S5 Table. Weighted mean outcomes and regression results.</b> |                  |           |                  |           |                       |                |           |
|-----------------------------------------------------------------|------------------|-----------|------------------|-----------|-----------------------|----------------|-----------|
|                                                                 | <b>Year 1</b>    |           |                  |           | <b>DiD estimation</b> |                |           |
|                                                                 | <b>FDC (756)</b> |           | <b>LDC (234)</b> |           | <b>ATT</b>            | <b>P-value</b> | <b>SE</b> |
|                                                                 | Baseline         | Follow-up | Baseline         | Follow-up |                       |                |           |
| <i>Adherence and Persistence</i>                                |                  |           |                  |           |                       |                |           |
| Proportion of days covered                                      | 0.69             | 0.88      | 0.69             | 0.66      | 0.22                  | <0.001         | 0.02      |
| Days until discontinuation <sup>a</sup>                         | 276.69           | N/A       | 157.79           | N/A       | 119.04                | <0.001         | 8.31      |
| <i>Indicators for health care utilization</i>                   |                  |           |                  |           |                       |                |           |
| Outpatient cases                                                | 14.07            | 14.06     | 14.80            | 14.96     | -0.16                 |                | 0.63      |
| due to diabetes                                                 | 5.98             | 6.15      | 5.78             | 6.01      | -0.07                 |                | 0.28      |
| Pharmaceutical prescriptions                                    | 22.51            | 21.05     | 24.12            | 26.68     | -4.02                 | <0.001         | 1.07      |
| due to diabetes                                                 | 4.23             | 4.14      | 4.83             | 9.32      | -4.59                 | <0.001         | 0.20      |
| Proportion with emergency visits                                | 0.12             | 0.07      | 0.16             | 0.09      | 0.02                  |                | 0.04      |
| due to T2D comorbidities                                        | 0.03             | 0.01      | 0.03             | 0.01      | 0.01                  |                | 0.02      |
| <i>Therapeutic safety</i>                                       |                  |           |                  |           |                       |                |           |
| Proportion with adverse drug events                             | 0.08             | 0.08      | 0.11             | 0.07      | 0.04                  |                | 0.03      |
| <i>Comorbidities</i>                                            |                  |           |                  |           |                       |                |           |
| Proportion with microangiopathic complications                  |                  |           |                  |           |                       |                |           |
| Eye complication                                                | 0.17             | 0.17      | 0.16             | 0.17      | 0.00                  |                | 0.04      |
| Renal failure                                                   | 0.13             | 0.12      | 0.14             | 0.14      | 0.00                  |                | 0.03      |
| Diabetic foot syndrome/<br>Periphere neuropathy                 | 0.21             | 0.21      | 0.21             | 0.19      | 0.02                  |                | 0.04      |
| Proportion with macroangiopathic complications                  |                  |           |                  |           |                       |                |           |
| Myocardial infarction                                           | 0.04             | 0.03      | 0.04             | 0.03      | 0.00                  |                | 0.02      |
| Ischemic heart disease                                          | 0.18             | 0.18      | 0.20             | 0.19      | 0.00                  |                | 0.03      |
| Angina pectoris                                                 | 0.03             | 0.03      | 0.03             | 0.02      | 0.00                  |                | 0.02      |
| Heart failure                                                   | 0.05             | 0.04      | 0.06             | 0.05      | 0.01                  |                | 0.01      |
| Cerebrovascular disease                                         | 0.08             | 0.09      | 0.09             | 0.09      | 0.00                  |                | 0.02      |
| <i>Treatment modification<sup>b</sup></i>                       |                  |           |                  |           |                       |                |           |
| Proportion with alternative                                     |                  |           |                  |           |                       |                |           |
| Oral antidiabetic prescription                                  | N/A              | 0.25      | N/A              | 0.29      | 0.00                  |                | 0.03      |
| Insulins                                                        | N/A              | 0.06      | N/A              | 0.03      | 0.03                  | 0.03           | 0.01      |

FDC: fixed-dose combination, LDC: loose-dose combination, ATT: average treatment effect on the treated represents excess outcomes attributable to FDC, SE: standard error

<sup>a</sup>refers to discontinuation of treatment in year one of post-index period, estimated using weighted least squares

<sup>b</sup>based on individuals who modified their dual therapy (N: FDC=732, LDC=229)

**S5 Table. (Continued) Weighted mean outcomes and regression results.**

|                                                 | Year 2    |           |           |           |                |         |      |
|-------------------------------------------------|-----------|-----------|-----------|-----------|----------------|---------|------|
|                                                 | FDC (756) |           | LDC (234) |           | DiD estimation |         |      |
|                                                 | Baseline  | Follow-up | Baseline  | Follow-up | ATT            | P-value | SE   |
| <i>Adherence and Persistence</i>                |           |           |           |           |                |         |      |
| Proportion of days covered                      | 0.69      | 0.83      | 0.69      | 0.58      | 0.25           | <0.001  | 0.02 |
| Days until discontinuation <sup>a</sup>         | N/A       | N/A       | N/A       | N/A       | N/A            |         | N/A  |
| <i>Indicators for health care utilization</i>   |           |           |           |           |                |         |      |
| Outpatient cases                                | 14.07     | 13.95     | 14.80     | 14.14     | 0.54           |         | 0.63 |
| due to diabetes                                 | 5.98      | 6.05      | 5.78      | 5.66      | 0.17           |         | 0.29 |
| Pharmaceutical prescriptions                    | 22.51     | 20.20     | 24.12     | 25.29     | -3.48          | <0.001  | 1.14 |
| due to diabetes                                 | 4.23      | 3.29      | 4.83      | 7.55      | -3.66          | <0.001  | 0.27 |
| Proportion with emergency visits                | 0.12      | 0.08      | 0.16      | 0.08      | 0.03           |         | 0.04 |
| due to T2D comorbidities                        | 0.03      | 0.02      | 0.03      | 0.03      | -0.01          |         | 0.02 |
| <i>Therapeutic safety</i>                       |           |           |           |           |                |         |      |
| Proportion with adverse drug events             | 0.08      | 0.08      | 0.11      | 0.08      | 0.03           |         | 0.03 |
| <i>Comorbidities</i>                            |           |           |           |           |                |         |      |
| Proportion with microangiopathic complications  |           |           |           |           |                |         |      |
| Eye complication                                | 0.17      | 0.18      | 0.16      | 0.21      | -0.03          |         | 0.04 |
| Renal failure                                   | 0.13      | 0.18      | 0.14      | 0.19      | 0.01           |         | 0.04 |
| Diabetic foot syndrome/<br>Periphere neuropathy | 0.21      | 0.30      | 0.21      | 0.26      | 0.03           |         | 0.04 |
| Proportion with macroangiopathic complications  |           |           |           |           |                |         |      |
| Myocardial infarction                           | 0.04      | 0.03      | 0.04      | 0.02      | 0.02           |         | 0.02 |
| Ischemic heart disease                          | 0.18      | 0.19      | 0.20      | 0.23      | -0.02          |         | 0.03 |
| Angina pectoris                                 | 0.03      | 0.02      | 0.03      | 0.02      | 0.01           |         | 0.02 |
| Heart failure                                   | 0.05      | 0.06      | 0.06      | 0.07      | 0.01           |         | 0.02 |
| Cerebrovascular disease                         | 0.08      | 0.10      | 0.09      | 0.11      | 0.00           |         | 0.02 |
| <i>Treatment modification<sup>b</sup></i>       |           |           |           |           |                |         |      |
| Proportion with alternative                     |           |           |           |           |                |         |      |
| Oral antidiabetic prescription                  | N/A       | 0.58      | N/A       | 0.59      | 0.02           |         | 0.04 |
| Insulins                                        | N/A       | 0.17      | N/A       | 0.14      | 0.03           |         | 0.03 |

FDC: fixed-dose combination, LDC: loose-dose combination, ATT: average treatment effect on the treated represents excess outcomes attributable to FDC, SE: standard error

<sup>a</sup>refers to discontinuation of treatment in year one of post-index period, estimated using weighted least squares

<sup>b</sup>based on individuals who modified their dual therapy (N: FDC=732, LDC=229)

**S5 Table. (Continued) Weighted mean outcomes and regression results.**

|                                                 | Year 3    |           |           |           |                |         |      |
|-------------------------------------------------|-----------|-----------|-----------|-----------|----------------|---------|------|
|                                                 | FDC (756) |           | LDC (234) |           | DiD estimation |         |      |
|                                                 | Baseline  | Follow-up | Baseline  | Follow-up | ATT            | P-value | SE   |
| <i>Adherence and Persistence</i>                |           |           |           |           |                |         |      |
| Proportion of days covered                      | 0.69      | 0.81      | 0.69      | 0.52      | 0.29           | <0.001  | 0.03 |
| Days until discontinuation <sup>a</sup>         | N/A       | N/A       | N/A       | N/A       | N/A            |         | N/A  |
| <i>Indicators for health care utilization</i>   |           |           |           |           |                |         |      |
| Outpatient cases                                | 14.07     | 13.93     | 14.80     | 14.14     | 0.52           |         | 0.63 |
| due to diabetes                                 | 5.98      | 6.15      | 5.78      | 5.96      | -0.02          |         | 0.29 |
| Pharmaceutical prescriptions                    | 22.51     | 20.22     | 24.12     | 26.70     | -4.87          | <0.001  | 1.77 |
| due to diabetes                                 | 4.23      | 3.16      | 4.83      | 7.04      | -3.27          | <0.001  | 0.23 |
| Proportion with emergency visits                | 0.12      | 0.10      | 0.16      | 0.10      | 0.03           |         | 0.04 |
| due to T2D                                      | 0.03      | 0.02      | 0.03      | 0.01      | 0.01           |         | 0.02 |
| comorbidities                                   |           |           |           |           |                |         |      |
| <i>Therapeutic safety</i>                       |           |           |           |           |                |         |      |
| Proportion with adverse drug events             | 0.08      | 0.08      | 0.11      | 0.09      | 0.01           |         | 0.03 |
| <i>Comorbidities</i>                            |           |           |           |           |                |         |      |
| Proportion with microangiopathic complications  |           |           |           |           |                |         |      |
| Eye complication                                | 0.17      | 0.16      | 0.16      | 0.23      | -0.07          |         | 0.05 |
| Renal failure                                   | 0.13      | 0.20      | 0.14      | 0.23      | -0.02          |         | 0.04 |
| Diabetic foot syndrome/<br>Periphere neuropathy | 0.21      | 0.31      | 0.21      | 0.32      | -0.02          |         | 0.05 |
| Proportion with macroangiopathic complications  |           |           |           |           |                |         |      |
| Myocardial infarction                           | 0.04      | 0.04      | 0.04      | 0.02      | 0.02           |         | 0.02 |
| Ischemic heart disease                          | 0.18      | 0.21      | 0.20      | 0.24      | -0.01          |         | 0.04 |
| Angina pectoris                                 | 0.03      | 0.03      | 0.03      | 0.04      | -0.01          |         | 0.03 |
| Heart failure                                   | 0.05      | 0.08      | 0.06      | 0.08      | 0.02           |         | 0.02 |
| Cerebrovascular disease                         | 0.08      | 0.10      | 0.09      | 0.12      | -0.01          |         | 0.03 |
| <i>Treatment modification<sup>b</sup></i>       |           |           |           |           |                |         |      |
| Proportion with alternative                     |           |           |           |           |                |         |      |
| Oral antidiabetic prescription                  | N/A       | 0.78      | N/A       | 0.79      | -0.01          |         | 0.03 |
| Insulins                                        | N/A       | 0.26      | N/A       | 0.29      | -0.03          |         | 0.04 |

FDC: fixed-dose combination, LDC: loose-dose combination, ATT: average treatment effect on the treated represents excess outcomes attributable to FDC, SE: standard error

<sup>a</sup>refers to discontinuation of treatment in year one of post-index period, estimated using weighted least squares

<sup>b</sup>based on individuals who modified their dual therapy (N: FDC=732, LDC=229)
